# Supplementary material for: Immune signature of metastatic breast cancer: Identifying predictive markers of immunotherapy response
Source: PubMed Central journal article supplement (PMC5564574; doi:10.18632/oncotarget.17653), 2017-05-07
Supplement: oncotarget-08-47400-s001.pdf [file oncotarget-08-47400-s001.pdf]

# Immune signature of metastatic breast cancer: Identifying predictive markers of immunotherapy response

## Supplementary Materials

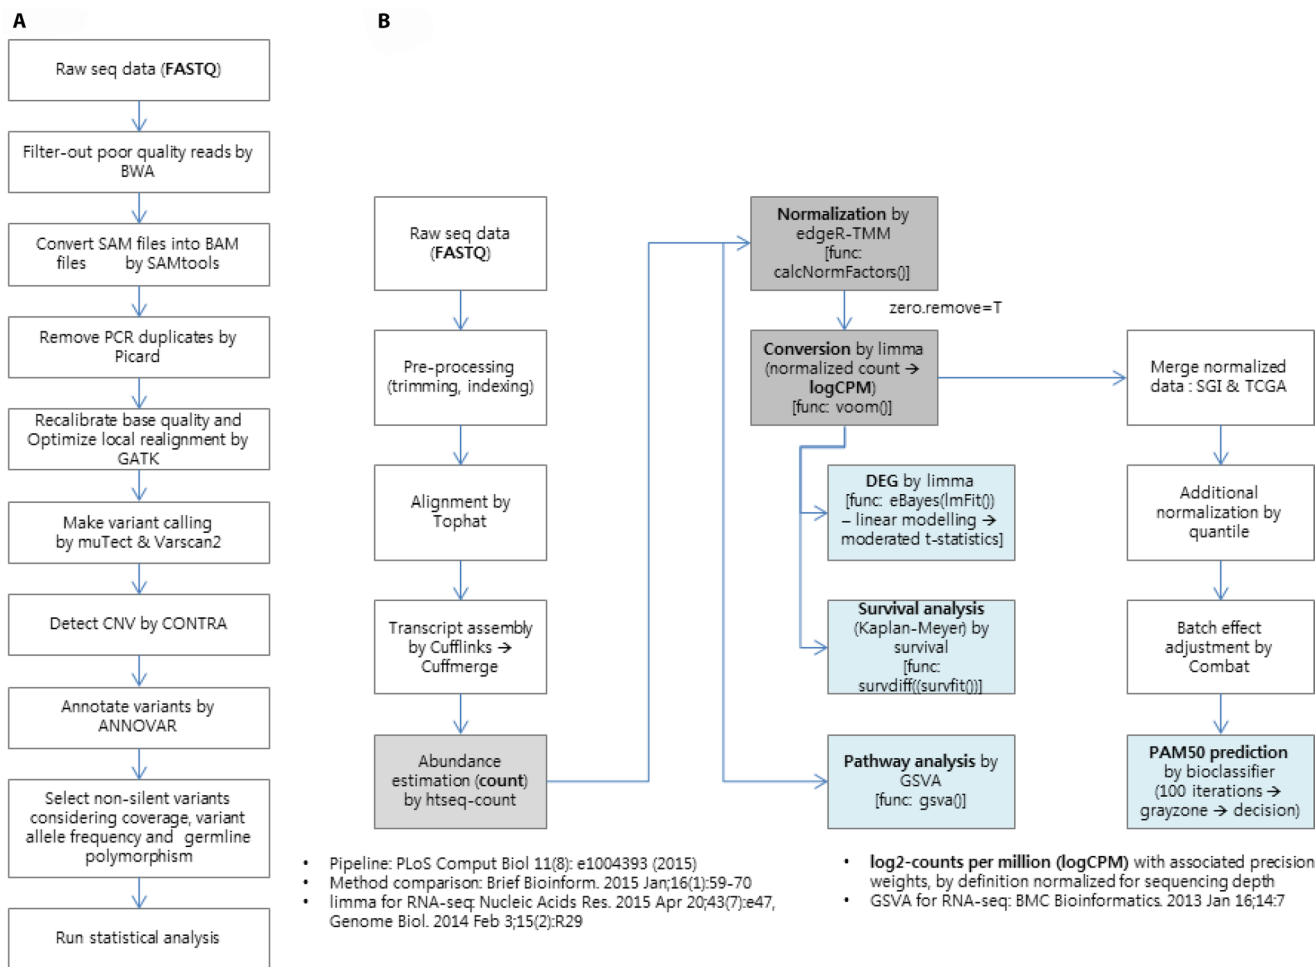

Supplementary Figure 1: Pipeline of next generation sequencing data analysis (A) whole exome sequencing (B) RNA-Seq.

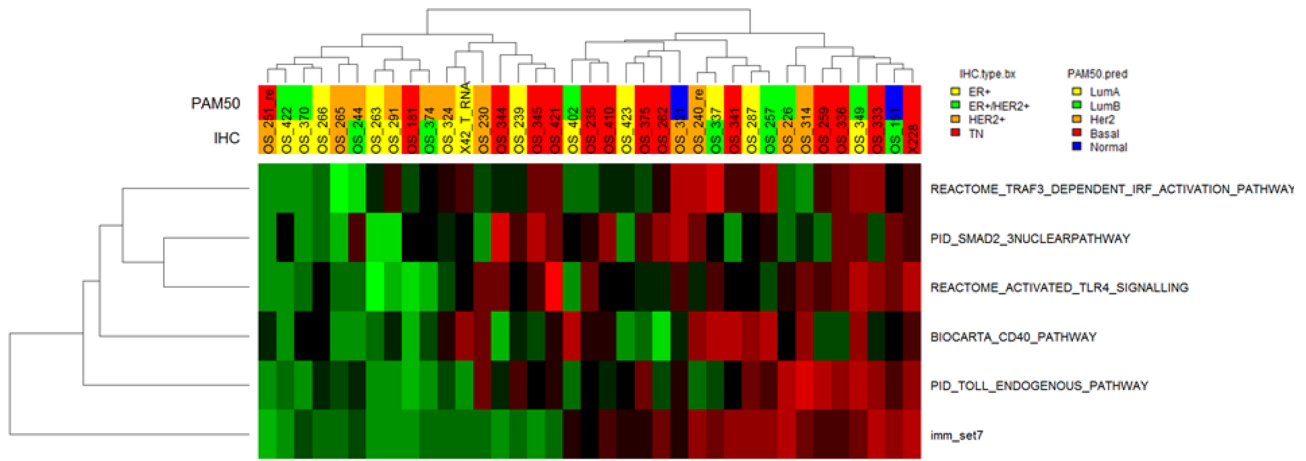

Supplementary Figure 2: Immune pathway gene set expression that associated survival duration in metastatic BC.

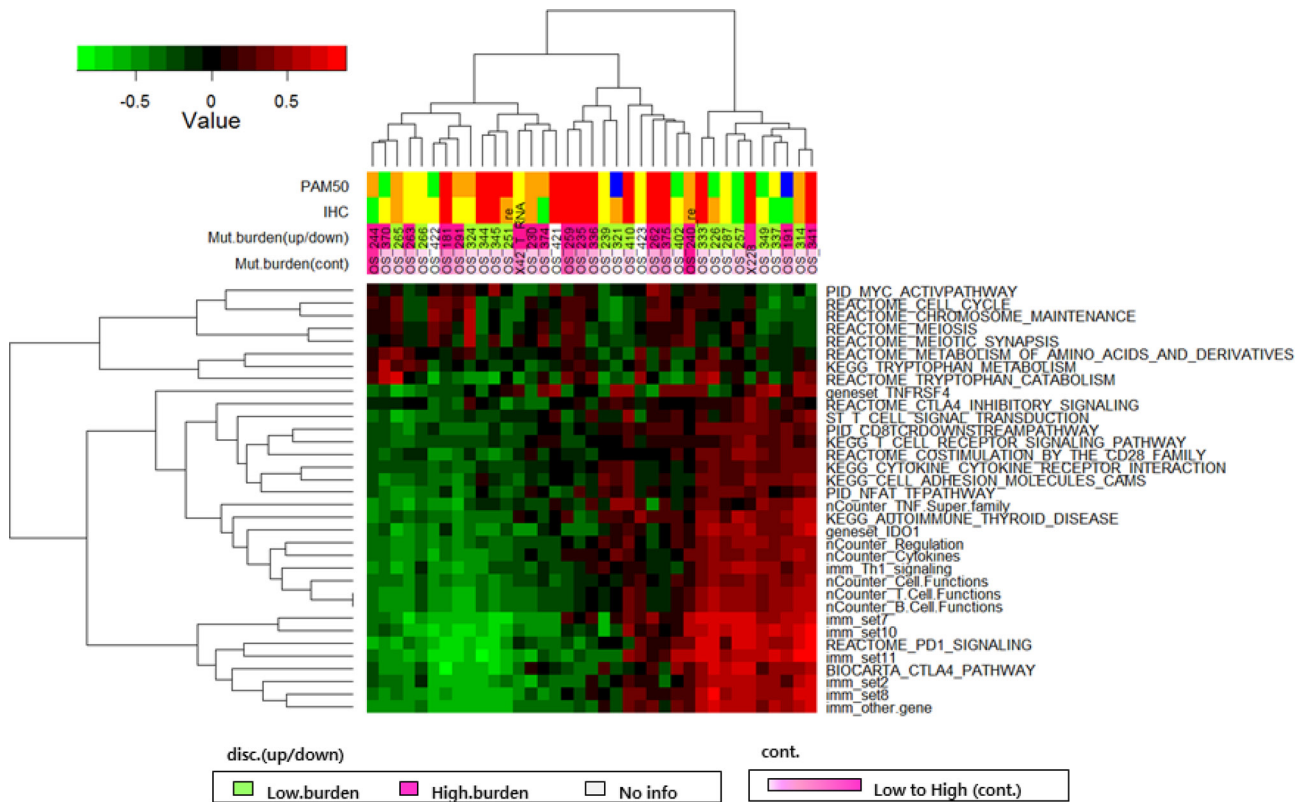

Supplementary Figure 3: The association between mutation burden and immune gene set expression.

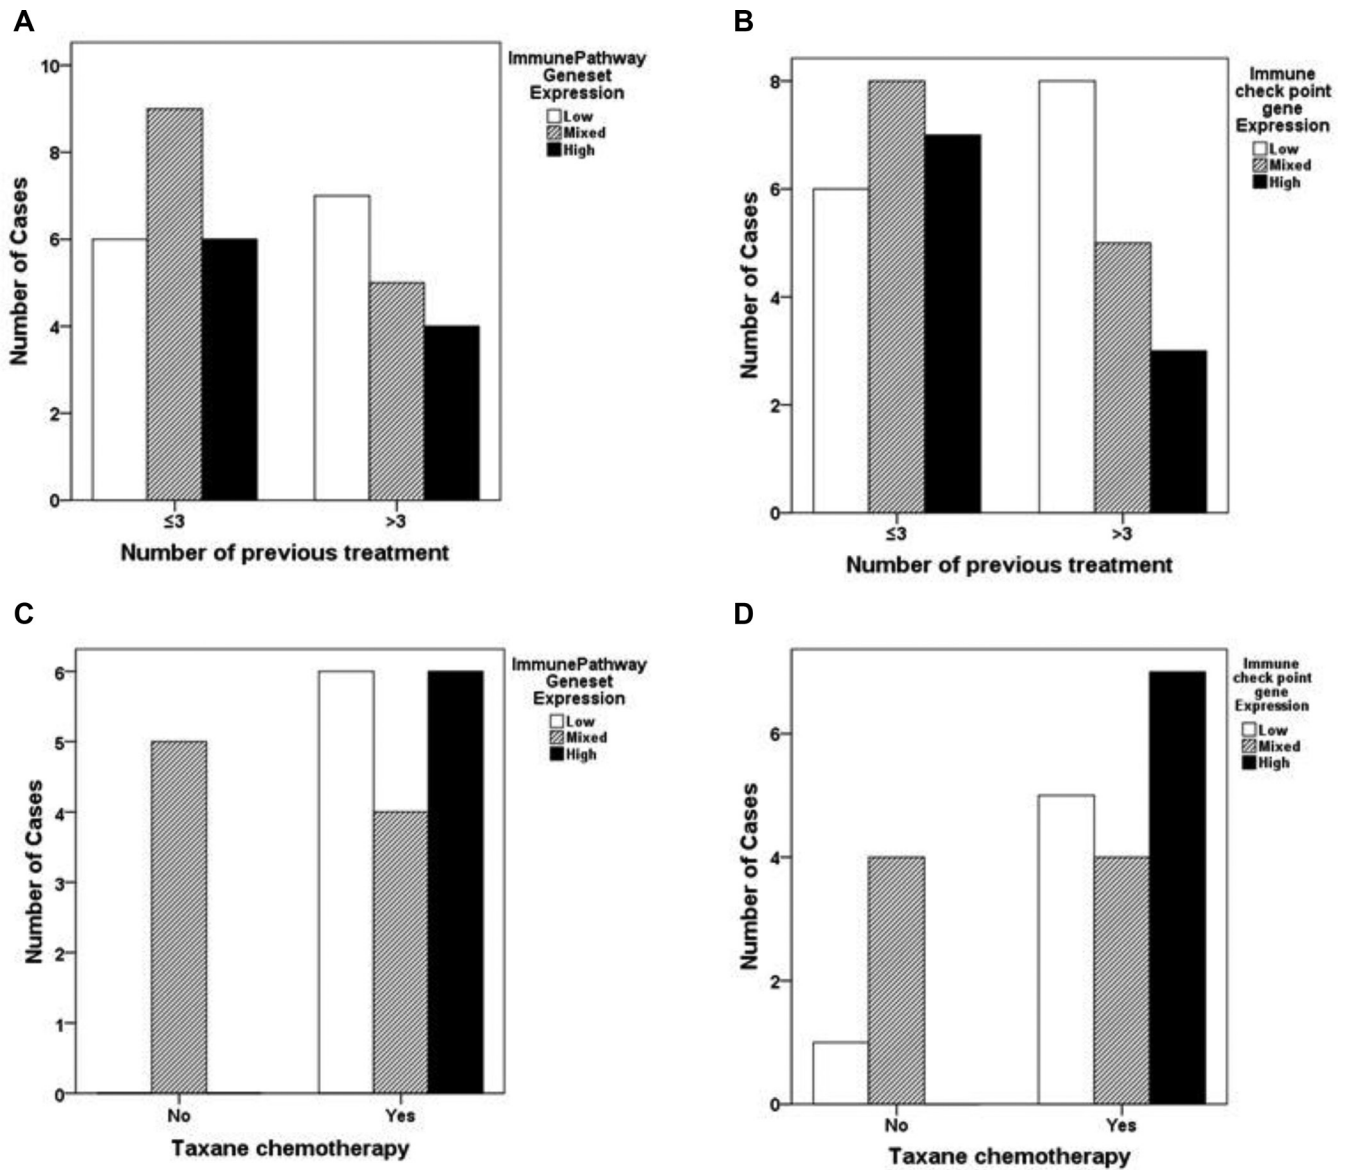

**Supplementary Figure 4:** The association between (A) immune pathway gene set expression and previous treatment; (B) immune check point gene expression and previous treatment; (C) immune pathway gene set expression and previous taxane treatment; (D) immune check point gene expression and previous taxane treatment.

**Supplementary Table 1: Impact of clinicopathological characteristics on immune signature ( $N = 37$ ).** See Supplementary\_Table\_1

**Supplementary Table 2: Clinicopathological characteristics of metastatic breast cancer  $N = 37$ .** See Supplementary\_Table\_2

**Supplementary Data 1: list\_immune\_pathway.** See Supplementary\_Data\_1
